# Supplementary material for: Effect of gastroesophageal reflux disease on sleep disorders: a Mendelian randomization study
Source: bioRxiv or medRxiv preprint supplement (doi:10.1101/2023.02.11.23285798), 2023-02-14
Supplement: Supplementary file [file media-3.pdf]

MR Method

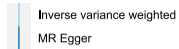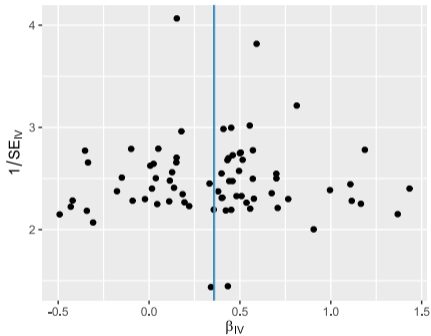

(A) sleep disorders

MR Method

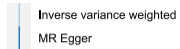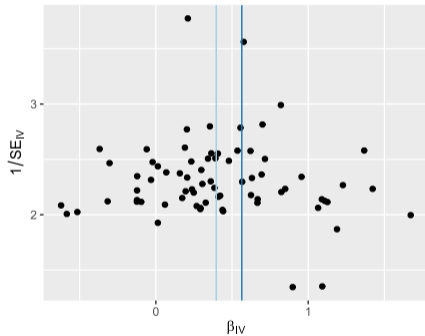

(B) sleep apnoea

MR Method

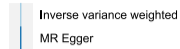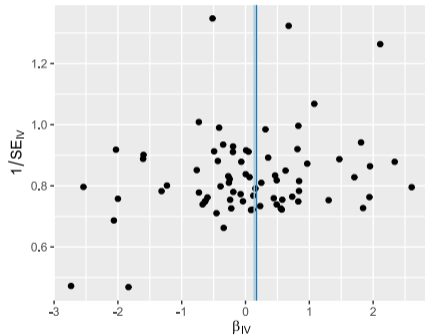

(C) insomnia
